# Supplementary figures and images for: Fixel-based analysis reveals alterations is brain microstructure and macrostructure of preterm-born infants at term equivalent age
Source: PubMed Central journal article supplement — Neuroimage Clin. 2018 Jan 11;18:51–9. doi: 10.1016/j.nicl.2018.01.003 (PMC5984576; doi:10.1016/j.nicl.2018.01.003), 2018-01-11

**FD**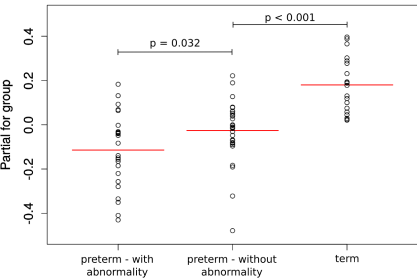**log(FC)**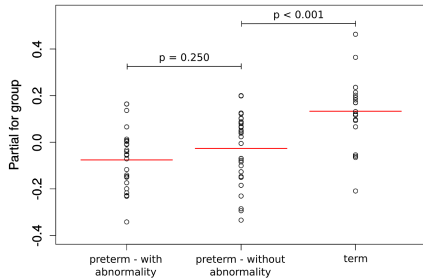**FDC**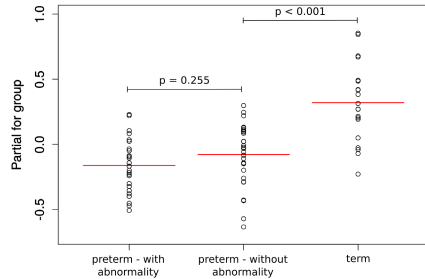**FD**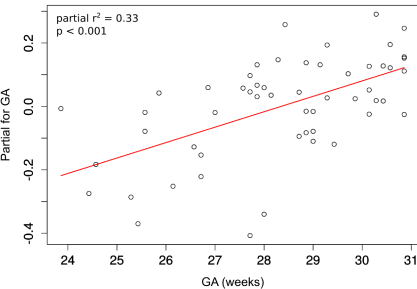**log(FC)**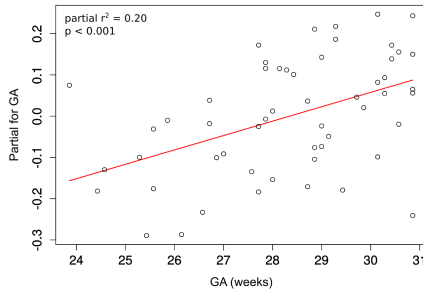**FDC**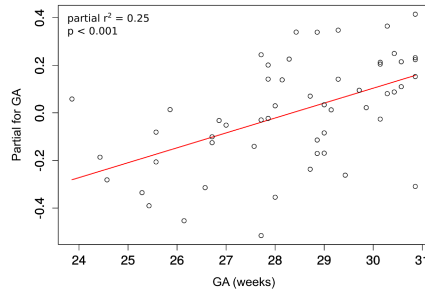

Supplement: mmc1.pdf [file mmc1.pdf]
